16 **ABSTRACT**

17 Human astrovirus nonstructural protein nsP1a/4, located at the C-terminal end of  
18 nsP1a, is thought to be involved in the regulation of RNA replication and capsid  
19 maturation; however, its roles in viral growth and virulence are not well understood.  
20 We investigated the intracellular host proteins that interact with nsP1a and  
21 explored the potential roles of the interaction in the pathogenesis of human  
22 astrovirus infection. We screened 14 independent proteins with a cDNA library  
23 derived from Caco-2 cells using a yeast two-hybrid technique. Deletion analysis  
24 revealed that interaction between the nsP1a/4 domain and the large extracellular  
25 loop (LEL) domain of the human protein CD63 is necessary for astrovirus  
26 replication. The interaction was confirmed by glutathione-S-transferase (GST)  
27 pull-down assays and co-immunoprecipitation assays. Confocal microscopy  
28 showed that nsP1a/4 and CD63 co-localized in the cytoplasm of infected cells.  
29 Over expression of CD63 promoted viral RNA synthesis, whereas knockdown  
30 of CD63 markedly decreased viral RNA levels. Those results suggest that CD63  
31 plays a critical role in human astrovirus RNA replication. The interaction  
32 between CD63 and nsP1a/4 provides a channel to further understand the roles of  
33 interactions between host and virus proteins in astrovirus infection and release.

34

35 **IMPORTANCE**

36 Human astroviruses cause gastroenteritis in young children and  
37 immunocompromised patients. In this study, we provide evidence that nsP1a/4,

38 a nonstructural protein located at the C-terminal end of the human astrovirus  
39 nsP1a polyprotein, interacts with the host protein CD63. Over expression of  
40 CD63 promoted viral RNA replication, whereas knockdown of CD63 decreased  
41 virus RNA replication, indicating that CD63 plays a critical role in the human  
42 astrovirus life cycle.

43

44 **KEYWORDS:** human astrovirus, HAstV, protein-protein interaction, nsP1a,  
45 nsP1a/4, CD63, virus replication

46

47 Viruses are obligate intracellular pathogens that utilize host-cell machinery to  
48 infect cells, replicate themselves, and then exit the cells for another round of  
49 infection. Human astroviruses (HAstVs) are a group of non-enveloped,  
50 single-stranded, and positive-sense RNA viruses in the family *Astroviridae*.  
51 HAstVs are causative agents of viral diarrhea in young children,  
52 immunocompromised patients, and elderly individuals (1-5). The astrovirus  
53 genome has three open reading frames (ORFs); ORF1a and ORF1b encode two  
54 nonstructural polyproteins (nsPs), and ORF2 encodes the capsid protein (6). The  
55 nsP1a polyprotein, transcribed from ORF1a, is involved in viral transcription  
56 and replication. When HAstV infects a host cell, nsP1a is cleaved into at least  
57 four products, named nsP1a/1, nsP1a/2, nsP1a/3 (protease), and nsP1a/4. The  
58 nsP1a/4 protein is located at the C-terminal end of nsP1a. Several domains have  
59 been identified in nsP1a/4, including two coiled-coil regions, a death domain  
60 (DD), a nuclear localization signal (NLS), a putative viral genome-linked  
61 protein (VPg), and a hypervariable region (HVR) (7-12). It was confirmed that  
62 nsP1a/4 plays important roles in the activation of capsid maturation and the  
63 regulation of RNA replication (13, 14). To better understand the roles of nsP1a  
64 and nsP1a/4 in HAstV infection and replication, we characterized host proteins  
65 that interact with nsP1a or nsP1a/4 by utilizing a yeast two-hybrid approach. We  
66 identified at least 14 host proteins that could bind to nsP1a, one of which was  
67 CD63.

68 CD63, a member of the tetraspan transmembrane protein family, is a

69 four-span membrane protein that is widely distributed in multicellular organisms  
70 and known to be associated with virus functions, such as adhesion, fusion, and  
71 trafficking (15, 16). Tetraspanins, a large superfamily of cell-surface membrane  
72 proteins characterized by four transmembrane domains, have the unique  
73 property to form a network of protein-protein interactions through associations  
74 with multiple membrane proteins that are involved in several infectious diseases  
75 (17, 18). There is increasing evidence suggesting that intracellular pathogens,  
76 especially viruses, “hijack” tetraspanins when entering, traversing and exiting  
77 cells during the course of infection. Several studies have reported that  
78 tetraspanins, such as CD151 (19), CD81 (20, 21), CD82 (22), CD9 (23), and  
79 CD63 (24), are key players in the lifecycles of many viruses.

80 In this study, we used co-immunoprecipitation and  
81 glutathione-S-transferase(GST) pull-down assays to confirm that CD63 can  
82 interact with nsP1a/4. Confocal microscopy revealed that the CD63 large  
83 extracellular loop (LEL) domain co-localizes with nsP1a/4 in the cytoplasm.  
84 CD63 knockdown or overexpression strongly affected the replication of HAstV  
85 in Caco-2 cells. Those findings indicate that CD63 plays an important role in the  
86 HAstV life cycle.

87

## 88 **RESULTS**

89 **A yeast two-hybrid screen with nsP1a and a Caco-2 cDNA library**  
90 **identified CD63 as a host protein that interacts with nsP1a.** We investigated

91 the interactions between HAstV nsP1a and host proteins using a protein-protein  
92 overlay assay. We amplified the nsP1a gene by PCR and inserted the resulting  
93 PCR product (2781bp) by recombination cloning into the yeast two-hybrid  
94 (Y2H) bait vector pGBKT7 as a C-terminal fusion with a Gal4 DNA-binding  
95 domain (BD). We confirmed the correct constructs by enzyme digestion and  
96 DNA sequence analysis (Fig 1A). When introduced alone into yeast Y2HGold  
97 cells, the Gal4 (BD)-nsP1a bait construct was not toxic to the yeast and did not  
98 auto-activate the Y2H reporter gene, indicating that the construct was suitable  
99 for use in a Y2H screen (Fig 1B).

100 Using a Y2H assay with Gal4 (BD)-nsP1a as bait and a human Caco-2 cDNA  
101 prey library, we screened approximately  $2.5 \times 10^5$  clones and identified 14  
102 positive bait-prey interactions. Sequence and bioinformatics analysis of the 14  
103 positive prey plasmids, listed by their initial positive-interaction identification  
104 number, indicated that they represented 14 different human cDNAs (data not  
105 shown). We next measured the strength of interaction between the nsP1a bait and  
106 each of the 14 human prey proteins in yeast using a qualitative growth assay and  
107 quantitative  $\beta$ -galactosidase activity assays. We performed bioinformatic  
108 analysis of the human proteins confirmed by the qualitative growth assay to gain  
109 functional insights into the potential interactions between those proteins and  
110 nsP1a (Fig 2). We selected one host protein, identified as tetraspan  
111 transmembrane protein CD63 (GenBank accession number: NM\_001040034.1),  
112 for further study.

113        **nsP1a interacts with CD63 *in vivo*.** We transfected HEK293 T cells with  
114 PEF-HA-nsP1a and pcDNA3.1-3flag-CD63. After 48 h, we performed  
115 immunoprecipitation with the cell lysates from those cells using an anti-Flag M2  
116 Affinity Gel (Sigma, St. Louis, MO, USA). We analyzed the resulting protein  
117 complexes by western blot with anti-Flag or anti-HA antibody (Fig. 3A). We  
118 detected no proteins in control lysates from cells transfected with empty vector  
119 (Fig. 3A, lane 1). We detected CD63 protein only in the lysates from cells that  
120 were transfected with pcDNA3.1-3flag-CD63 (Fig. 3A, lane 2). Likewise, we  
121 detected nsP1a protein only in the lysates from cells that were transfected with  
122 PEF-HA-nsP1a (Fig. 3A, lane 3). Both nsP1a and CD63 were readily detected in  
123 the lysates from cells that were co-transfected with pcDNA3.1-3flag-CD63 and  
124 PEF-HA-nsP1a. The HA antibody was able to pull down CD63-Flag together  
125 with nsP1a-HA (Fig. 3A, lane 4). Likewise, the Flag antibody was able to pull  
126 down nsP1a-HA together with CD63-Flag (Fig. 3A, lane 4). Taken together, the  
127 results suggested that nsP1a was able to interact with the CD63 *in vivo*.

128        **nsP1a interacts with CD63 *in vitro*.** To further investigate the interaction  
129 between nsP1a and CD63, we determined whether the interaction occurs  
130 *in vitro*. We expressed recombinant full-length nsP1a-GST fusion protein  
131 ( $\approx 118$  kDa) induced by isopropyl  $\beta$ -D-thiogalactopyranoside (IPTG) in  
132 *Escherichia coli* (Fig. 3B lanes 1–6). We also detected purified nsP1a from the  
133 bacteria (Fig. 3B lane 7) and human CD63 His Tag commercialized recombinant  
134 protein ( $\approx 26$  kDa) by western blot (Fig. 3B lane 8). We tested the interaction

135 between CD63 and nsP1a by GSTpull-down analysis. We immobilized  
136 nsP1a-GST on glutathione agarose and added CD63-His to assess  
137 protein-protein binding. We used an untreated gel as a negative control. We  
138 analyzed the protein in the complexes by western blot with anti-GST or anti-His  
139 antibody. Anti-GST MAb pulled down nsP1a together with CD63 (Fig. 3C).  
140 Consistent with those results, anti-His MAb could pull down CD63 protein  
141 together with nsP1a protein. In contrast, the negative control could not pull  
142 down any viral proteins. The results indicated that nsP1a could interact with  
143 CD63 *in vitro*.

144 **The nsP1a/4 protein interacts with the CD63 large-loop domain.** We  
145 performed binding experiments to identify the region of the nsP1a protein that  
146 interacts with CD63 *in vivo* and *in vitro*. CD63 contains 204–355 amino acids  
147 (20–30 kDa), comprising four transmembrane domains, a short extracellular  
148 loop (EC1), a long extracellular loop (EC2), a very short intracellular loop, and  
149 cytoplasmic N-terminal and C-terminal tails (Figure 4A). EC2, also called the  
150 large loop (LEL, 99aa), contains a variable region for specific protein-protein  
151 interactions. We constructed and confirmed the eukaryotic expression vector  
152 pcDNA3.1-3flag-CD63-LEL and the prokaryotic expression vector  
153 pET-29a-LEL. We expressed IPTG-induced recombinant CD63-LEL-His fusion  
154 protein in *E. coli* and recovered and purified the recombinant protein from the  
155 bacteria (Fig 4C).

156 We amplified the four products of the nsP1a polyprotein (nsP1a/1, nsP1a/2,



157 nsP1a/3 (protease), and nsP1a/4; Fig 4B) by RT-PCR. We used the PCR  
158 products to construct PEF-HA-1a/1, PEF-HA-1a/2, PEF-HA-1a/3, and HA-1a/4  
159 plasmids, which we confirmed by sequencing. We expressed recombinant  
160 nsP1a/4-GST fusion protein in bacteria and isolated and purified the fusion  
161 protein from the bacteria (Fig4D). We co-transfected HEK293T cells with  
162 pcDNA3.1-3flag-CD63-LEL and either PEF-HA-1a/1, PEF-HA-1a/2,  
163 PEF-HA-1a/3, or PEF-HA-1a/4. We then performed immunoprecipitation with  
164 lysates from the transfected cells and anti-HA or anti-Flag antibodies. We  
165 identified protein-protein interactions by GST pull-down (Fig 4E) or  
166 co-immunoprecipitation (Fig 4F) assays as described above. The results showed  
167 that the CD63 LEL domain interacted with nsP1a/4 *in vivo* and *in vitro*. In  
168 contrast, no interaction between CD63-LEL and nsP1a/1, nsP1a/2, or nsP1a/3  
169 were observed (data not shown).

170 **CD63-LEL co-localizes with nsP1a/4 in host cells.** We used  
171 immunofluorescence and confocal microscopy to further investigate the  
172 interaction between nsP1a/4 and CD63-LEL. We co-transfected HEK293T cells  
173 with the plasmids HA-nsP1a/4 and Flag-CD63-LEL. We then examined the  
174 subcellular localization of nsP1a/4 and CD63-LEL by confocal microscopy. The  
175 Flag-CD63-LEL (Fig. 5A) and HA-nsP1a/4 (Fig. 5B) proteins were distributed  
176 throughout the cytoplasm. We determined the position of the nucleus by DAPI  
177 staining (Fig. 5C). Statistical analysis of the images showed that the  
178 (immunofluorescence assay, IFA) signals of nsP1a/4 and CD63-LEL significantly

179 overlapped each other (Fig 5D). That finding confirmed that nsP1a/4 protein  
180 interacts with CD63-LEL in HEK293T cells. That result along with those of a  
181 previous Y2H screen and GSTpull-down and co-immunoprecipitation assays  
182 suggested that nsP1a/4 interacts with the CD63LEL domain.

183 **HAsV infection increases CD63 expression.** HAsV-1 nsP1a has been  
184 reported to regulate the viral RNA-replication process. To determine whether  
185 HAsV-1 infection affects CD63 expression, we infected Caco-2 cells with  
186 HAsV-1 (MOI 10). We collected lysates from mock-infected (control) and  
187 HAsV-infected cells 24h and 48h after infection. We isolated total cellular RNA  
188 and quantified the expression of CD63 mRNA using real-time RT-PCR(Fig. 6A).  
189 We also performed western blot to detect CD63 protein expression in the  
190 cellular lysates (Fig 6B). The results showed that the levels of CD63 mRNA and  
191 protein 48h after infection were higher in HAsV-infected cells than  
192 in mock-infected cells, suggesting that CD63 plays an important role in HAsV-1  
193 genome replication. Furthermore, we infected Caco-2 cells with HAsV-1(MOI  
194 1) and measured the amount of viral RNA present in the cell culture after 24h  
195 and 48h. The results showed that the amount of viral RNA was significantly  
196 increased at 24h and 48h in the HAsV-1-infected cells compared with those in  
197 the mock-infected cells ( $P < 0.01$ ; Fig 6C).

198 **CD63 expression affects HAsV replication.** To assess the role of CD63 in  
199 HAsV replication, we infected CD63-overexpressing and CD63-knockdown  
200 Caco-2 cells with HAsV-1 and measured the level of viral RNA 48 h after

201 infection. We assessed the overexpression and knockdown of CD63 by western  
202 blot and real-time RT-PCR, respectively (Fig. 6D and E). CD63 expression  
203 relative to the wild-type level was increased 5-fold in the cells transfected with  
204 the overexpression plasmid and decreased 10-fold in the cells transfected with  
205 the anti-CD63 shRNA. We then infected the cells with HAstV-1 (MOI 1) and  
206 measured the amount of viral RNA present in the cell cultures 48h after  
207 infection. The results showed a 1.45-fold increase in the level of HAstV-1 RNA  
208 in the cultures of CD63-overexpressing cells compared with that in cultures of  
209 control cells ( $P < 0.01$ ). The CD63 knockdown resulted in a 6-fold decrease  
210 in intracellular viral RNA levels ( $P < 0.01$ ; Fig 6F). Those results indicated that  
211 CD63 plays an important role in the HAstV lifecycle.

212

## 213 **DISCUSSION**

214 Positive-sense RNA viruses have frequently been found to replicate in  
215 association with a large number of cellular proteins (25). The C-terminal nsP1a  
216 protein of HAstV Yuc8 was shown to interact with the viral polymerase (14).  
217 Astrovirus replication and assembly have also been linked to fatty-acid synthesis,  
218 ATP biosynthesis, and cellular lipid metabolism (26), but it is unknown what  
219 host proteins contribute to a successful virus infection. We found that HAstV  
220 nsP1a or nsP1a/4 could interact with the host protein CD63 based on a Y2H  
221 screen and observations of direct interaction between nsP1a/4 and CD63 both  
222 *in vivo* and *in vitro*.

223 Although the function of HAstVnsP1a remains unclear, nsP1a and nsP1a/4  
224 have been suggested to be involved in many processes, including genome  
225 replication, apoptosis induction, and capsid maturation (8, 11). To better  
226 understand the role of nsP1a in viral replication, we analyzed the interaction of  
227 nsP1a with host proteins. A Y2H screen of aCaco-2 cDNA library showed that  
228 14 independent proteins, including CD63, interacted with nsP1a.

229 CD63 was the first characterized tetraspanin(27). It has been shown that  
230 CD63 reacts with many different proteins either directly or indirectly, including  
231 integrins(28,29), other tetraspanins(30,31), cell-surface receptors(32), and  
232 kinases(33). Viruses are obligate intracellular pathogens and must utilize  
233 host-cell machinery in order to complete their lifecycle. Viruses have been  
234 shown to incorporate many host components, including tetraspan  
235 transmembrane proteins (34). It is therefore highly likely that tetraspanins play  
236 an important role in the lifecycles of viruses. We confirmed that CD63 could  
237 interact with HAstV nsP1a both *in vivo* and *in vitro*. We transfected HEK293T  
238 cells with nsP1a-HA alone or together with CD63-Flag. We successfully  
239 recovered nsP1a-HA/CD63-Flag complex by co-immunoprecipitation assays of  
240 co-transfected cells. We showed that CD63 bound directly to nsP1a *in vitro*  
241 using GST pull-down analyses of purified recombinant GST-nsP1a protein and  
242 recombinant CD63-His protein. Those results showed that the HAstV nsP1a  
243 could interact with CD63.

244 In light of those results, we sought to explore the nsP1a/CD63 interaction in

245 more detail. GSTpull-down and co-immunoprecipitation analyses showed that  
246 the nsP1a C-terminal nonstructural protein nsP1a/4 (567–926aa, 40kDa) binds to  
247 the CD63 LEL domain. The LEL of CD63 displays some conserved residues.  
248 Protein-protein interaction sites have been found in the LEL domains of other  
249 proteins (35, 36). We verified that the CD63-LEL domain interacts with nsP1a/4  
250 *in vivo* and *in vitro*. Confocal microscopy also showed that nsP1a/4 and CD63  
251 co-localized in the cytoplasm. Previous data indicated that the HAstV nsP1a  
252 polyprotein would generate at least four products. The nonstructural C-terminal  
253 protein of nsP1a, which contains a hypervariable region, has been named nsP1a/4.  
254 The nonstructural N-terminal protein including nsP1a/1, nsP1a/2, and nsP1a/3 of  
255 the nsP1a polyprotein cannot interact with CD63, suggesting that nsP1a interacts  
256 with CD63 through its C-terminal region.

257 Tetraspanin proteins have been reported to be involved in the lifecycles of  
258 many viruses, such as human immunodeficiency virus (HIV)(37-39), hepatitis C  
259 virus (HCV) (40,41), human papillomavirus(HPV) (42,43), human T cell  
260 lymphotropic virus (HTLV) (44), porcine reproductive and respiratory  
261 syndrome virus (PPRSV) (45), and rotavirus(46). CD63 protein was confirmed  
262 to interact with the rotavirus VP6 protein and to be involved in the release of  
263 membrane vesicles by intestinal epithelial cells infected with rotavirus (47).  
264 CD63 also has been shown to play an essential role during HIV-1 replication in  
265 macrophages. CD63 can interact with and accumulate in close proximity to the  
266 HIV gp41 protein during the cell-to-cell transfer of HIV (48).

267 We constructed CD63-knockdown and CD63-overexpressing cells lines to  
268 determine if CD63 expression affects HAstV-1 replication. CD63 overexpression  
269 increased the viral mRNA level in infected cells, whereas CD63 knockdown  
270 reduced the viral mRNA level in infected cells. A previous study suggested  
271 that nsP1a/4 is involved in the viral RNA replication process and might be  
272 necessary for efficient formation of the viral RNA-replication complex through  
273 a direct interaction with the viral RNA or with other proteins of the complex  
274 (14). Further research is needed to investigate whether CD63 or nsP1a/4 is  
275 necessary for viral RNA or viral polymerase to form a functional replication  
276 complex and to identify which signal pathway is involved promoting virus  
277 replication.

278 We confirmed that CD63 is co-opted by HAstV nsP1a/4 during infection of  
279 susceptible host cells. The interaction between CD63 and nsP1a/4 appears to  
280 promote viral RNA replication. Our results confirmed that CD63 is involved in  
281 the formation of exosomes and is abundantly present in late endosomes and  
282 lysosomes. CD63 at the cell surface is endocytosed via a clathrin-dependent  
283 pathway. In late endosomes, CD63 is enriched on the intraluminal vesicles,  
284 which are secreted by specialized cells as exosomes via the fusion of endosomes  
285 with the plasma membrane. HAstV Yuc8 RNA replication occurs in association  
286 with host-cell membranes, and the entry of HAstV into host cells apparently  
287 depends on the maturation of endosomes (49). The significance of CD63  
288 function in HAstV infection and whether CD63 is involved in HAstV cell

289 binding, endocytosis, membrane vesicles, post-entry processing, or virus  
290 maturation still remains to be determined. We hypothesize that the CD63/nsP1a  
291 interaction plays a role in viral RNA replication, and further study is needed to  
292 verify that hypothesis.

293

## 294 **MATERIALS AND METHODS**

295 **Cell culture and virus infection.** HEK293T and Caco-2 cells were  
296 maintained in Dulbecco's Modified Eagle's Medium (DMEM; GIBCO, UK)  
297 containing 10% fetal calf serum (GIBCO, UK). A plasmid-based reverse  
298 genetics system for human astrovirus type 1 (HAstV-1) was provided by  
299 professor Akira Nakanishi, Department of Aging Intervention, National Center  
300 for Geriatrics and Gerontology Morioka, Obu, Aichi, Japan. An HAstV-1cDNA  
301 plasmid (pCAG-AVIC) that drives HAstV-1 cDNA expression from the CAG  
302 promoter was transfected into HEK293T cells. Cell-culture supernatants were  
303 collected 48 h after transfection and used as a source of recombinant viruses to  
304 infect Caco-2 cells (50). The virus was activated with 200 µg/mL porcine  
305 trypsin(Sigma) for 1h at 37°C before exposure to the cells. The virus titers in the  
306 Caco-2 cell cultures were determined by fluorescent-focus assays as described  
307 previously (50).

308 **Construction and expression of plasmids.** HAstV-1 nsP1a protein  
309 (GenBank accession number: AGX15183.1) was amplified using primers listed  
310 in Table 1 and cloned into pGBKT7 vector (Clontech USA, Mountain View, CA)

311 to generate BD-bait plasmid (pGBKT7-nsP1a) for the Y2H system. To generate  
312 N-terminally HA-tagged nsP1a and nsP1a/4 expression constructs, nsP1a or  
313 nsP1a/4 frames were amplified using the primers listed in Table 1. We extracted  
314 the total RNA of HAstV type 1 (HAstV-1) from Caco-2 cells and amplified  
315 nsP1a by RT-PCR. The PCR products were cloned into PEF-HA PGK Hygrp  
316 vector to create PEF-HA-nsP1a and PEF-HA-nsP1a/4 plasmids via the in-fusion  
317 HD Cloning method (TaKaRa Bio, Dalian, China). The expression plasmids  
318 pGEX-6P-1-nsP1a and pGEX-6P-1-nsP1a/4 were generated via the insertion of  
319 nsP1a or nsP1a/4 cDNA between the *Bam*H I and *Xho* I sites of pGEX-6P-1.  
320 The expression plasmid pET-29a-CD63-LEL was generated via the insertion  
321 of CD63-LEL cDNA between the *Xho* I and *Bam*H I sites of pET-29. To generate  
322 N-terminally Flag-tagged CD63 (GenBank accession number: NM\_001040034.1)  
323 or CD63-LEL expression constructs, CD63 or CD63-LEL PCR products were  
324 cloned into pcDNA3.1(+) vector to create pcDNA3.1-3flag-CD63 and  
325 pcDNA3.1-3flag-CD63-LEL via the in-fusion HD Cloning method.

326 **Expression and purification of recombinant nsP1a, nsP1a/4, and LEL**  
327 **proteins.** The nsP1a and nsP1a/4 proteins were expressed and purified using  
328 the same protocol was used for the CD63-LEL protein with some modifications.  
329 Briefly, the recombinant plasmid was transformed into competent *E. coli* BL21  
330 (DE3) cells, which were then grown overnight in 5 mL Luria-Bertani broth. The  
331 incubation was continued until the optical density (OD<sub>600</sub>) reached 0.6–0.8.  
332 The expression of the protein was induced with 0.1–1 mM IPTG at 25–37°C



333 withshaking at 220 rpm. Expression of the protein was then analyzed by  
334 SDS-PAGE. Supernatant containing the fusion protein was purified using  
335 Glutahione Sepharose 4B (GE Healthcare Bio-Sciences, Little Chalfont, UK)  
336 according to the manufacturer's instructions. The purification of recombinant  
337 nsP1a, nsP1a/4, and LEL proteins was further confirmed by western blot.

338 **Plasmid transfection.** HEK293T cells were transfected with plasmids  
339 containing recombinant DNA using the Lipofectamine 2000 transfection reagent  
340 (Invitrogen) according to the manufacturer's protocol. Briefly, cells were grown  
341 to approximately 90% confluence on six-well palates. The culture medium was  
342 replaced by serum-free medium containing the desired plasmid and  
343 Lipofectamine2000. The cells were incubated for 48 h at 37°C in 5% CO<sub>2</sub> and  
344 harvested for examination by western blot analysis to confirm the protein  
345 expression.

346 **Antibodies.** Anti-Flag murine IgG1 monoclonal antibody, anti-HA murine  
347 IgG1 monoclonal antibody, rabbit antibody, anti-GST-Tag mouse polyclonal  
348 antibody, and anti-His-tag mouse polyclonal antibody were used (Sigma).  
349 Horseradish peroxidase-labeled goat anti-mouse IgG or goat anti-rabbit IgG  
350 (Santa Cruz Biotechnology Co.,Ltd, Shanghai, China) were used for western  
351 blotting. FITC-labeled goat anti-mouse IgG and Alexa Fluor®-labeled Goat  
352 Anti-rabbit IgG (Santa Cruz Biotechnology) were used as secondary antibodies  
353 for immunofluorescence and confocal microscopy. A polyclonal antibody to  
354 recombinant nsP1a or nsP1a/4 of HAstV was prepared in a previous study (51).

355 **Isolation of nsP1a-interacting cDNA clones using the Y2H technique.**

356 A full-length expression cDNA library derived from the Caco-2 cell line was  
357 constructed for three ORFs. Y2H media set (Clontech, TaKaRa Biomedical  
358 Technology Co., Ltd., Dalian, China) was used to identify nsP1a binding factors  
359 according to the manufacturer's instructions. In brief, AH109 and Y187 cells  
360 were transformed with the bait (pGBKT7-nsP1a) and prey (Caco-2 cDNA  
361 library) constructs, respectively, according to the yeast transformation protocol  
362 (Clontech). A clone of the bait transformant was mated with a clone of the prey  
363 transformant and grown at 30°C overnight in 1 mL yeast extract peptone  
364 dextrose broth. The mated clones were selected on SD medium fortified with  
365 tryptophan and leucine to ensure successful mating. Finally, the interacting  
366 partners were screened on SD media lacking tryptophan (-Trp), leucine (-Leu),  
367 adenine (-Ade), and histidine (-His). Plasmids pGBKT7-53 and pGADT7-T,  
368 encoding the interacting protein pair P53 and Simian virus 40 (SV40) large T  
369 antigen, respectively, were used as positive controls. Plasmids pGBKT7-Lam  
370 and pGADT7-T, encoding the non-interacting protein pair lamin and SV40 large  
371 T antigen, respectively, served as negative controls.

372 **Western blot.** Protein samples were separated by 12% SDS-PAGE and then  
373 transferred onto PVDF membranes (Millipore, Bedford, MA, USA). The  
374 membranes were incubated with anti-HA mAb(1:5000), anti-Flag  
375 mAb(1:10000), anti-CD63 mAb (1:2000), and anti-CD63 mAb  
376 (1:1000), respectively. The membranes were subsequently rinsed with PBST and

377 treated with HRP-labeled goat anti-mouse IgG or goat anti-rabbit IgG as the  
378 secondary antibody (1:3000) (Santa Cruz Biotechnology). The proteins were  
379 visualized via scanning with ECL prime western blotting detection reagent  
380 (Beyotime Biotechnology, Beijing, China).

381 **GST pull-down assays.** The recombinant pGEX-6P-1-nsP1a or  
382 pGEX-6P-1-nsP1a/4 plasmids were used to transform competent *E. coli* BL21  
383 (DE3) cells. The cells were then grown overnight in 5 mL Luria-Bertani broth  
384 supplemented with ampicillin until the optical density (OD<sub>600</sub>) reached 0.6–0.8.  
385 Expression of pGEX-6P-nsP1a was induced with 0.1~1 mM IPTG at 25~37°C  
386 with shaking at 220 rpm and then analyzed by SDS-PAGE. GST-nsP1a protein  
387 was purified using a gravity-flow GST-Sefinose™ Resin (Sangon Bitech,  
388 Shanghai, China) column according to the manufacturer's instructions and  
389 detected by SDS-PAGE. His-tagged recombinant human CD63 protein was  
390 obtained from ThermoFisher Scientific Sino Biological (China). The expression  
391 and purification of the CD63 LEL domain were performed by the same method  
392 used for nsP1a and nsP1a/4. The Pierce™ GST Protein Interaction Pull-Down  
393 Kit (Thermo Fisher Scientific) was used to identify the interaction between  
394 nsP1a or nsP1a/4 and CD63 or CD63-LEL *in vitro*. In brief, prepared  
395 GST-nsP1a or GST-nsP1a/4 bait protein sample was bound to glutathione  
396 agarose. Then, the beads were washed four times with wash solution  
397 (25 mM Tris-HCl, 0.15 M NaCl, pH 7.2). Pull-Down Lysis Buffer was incubated  
398 with recombinant His-tagged CD63 or His-CD63-LEL at 4°C for at least 1 h

399 with gentle shaking. The eluted proteins were detected by SDS-PAGE followed  
400 by western blot analysis with anti-GST antibody and CD63 antibody.

401 **Co-immunoprecipitation of nsP1a/4 with CD63-LEL.** HEK293T cells  
402 were transfected with PEF-HA-nsP1a/4 and pcDNA3.1-3flag-CD63-LEL  
403 expression plasmids. Following transfection for 48 h, the cells were lysed in  
404 NP-40 lysis buffer containing protease inhibitors. Following the manufacturer's  
405 protocol, antibodies directed against Flag or HA were separately bound and  
406 cross-linked to Protein G Dynabeads (Novagen) using the reagents provided in  
407 the Pierce Crosslink Co-immunoprecipitation Kit (Pierce). Approximately 1–5  
408 mg of untransfected or transfected cell lysates were then mixed with different  
409 sets of antibody-coupled beads and washed. The eluted proteins were analyzed  
410 by western blot using Flag or HA antibody.

411 **Immunofluorescence and confocal microscopy.** HEK293T cells were  
412 co-transfected with PEF-HA-nsP1a/4 and pcDNA3.1-3flag-CD63-LEL plasmids.  
413 After 48 h, the cells were washed with 1 mL PBS and fixed with 4%  
414 paraformaldehyde for 10min at room temperature. After additional PBS washes,  
415 mouse anti-Flag and rabbit anti-HA was applied at a dilution of 1:1000. The cells  
416 were then incubated for 1h at room temperature, washed with PBS, and  
417 subsequently incubated with FITC-labeled goat anti-mouse IgG and Alexa  
418 Fluor®-labeled goat anti-rabbit IgG at a dilution of 1:500. The cells were then  
419 washed with PBS and observed under a confocal microscope.

420 **CD63 overexpression and knockdown.** The primers used to construct

421 pcDNA3.1-3flag-CD63 are listed in Table 1. Two pairs of shRNAs targeting  
422 human CD63 and a negative control shRNA (Table 1) were cloned into  
423 hU6-MCS-CMV-GFP-SV40-Neomycin vector (Shanghai Genechem Co.,Ltd.)  
424 to generate CD63-shRNA-1, CD63-shRNA-2, and CD63-NC, respectively.  
425 HEK293T cells were transfected with the constructs along with  
426 pcDNA3.1-3flag-CD63 using Lipofectamine 2000 transfection reagent  
427 (Invitrogen, Carlsbad, CA) following the manufacturer's protocol.

428 **Real-time RT-PCR.** The target gene CD63 and HAsV RNA were quantified  
429 by real-time RT-PCR using the primers listed in Table 1. Total RNA was  
430 isolated from HEK293T cells using TRIzol (Invitrogen) according to the  
431 manufacturer's instructions. cDNA was reverse transcribed from 1 $\mu$ g total RNA  
432 using PrimeScript Reverse Transcriptase (TaKaRa Bio,Dalian,China).  
433 Quantitative real-time RT-PCR was performed using the SYBR PrimeScript  
434 RT-kit(TaKaRa Bio) according to the manufacturer's instructions. The relative  
435 transcript levels were analyzed using the  $\Delta\Delta$ Ct method. The results were  
436 analyzed using Bio-RAD IQTM5 optical system software.

437 **Statistical analysis.** Data were presented as the mean  $\pm$  SD. Differences  
438 between groups were examined using Student's t test with  $P < 0.05$  as the  
439 threshold for statistical significance.

440

#### 441 **ACKNOWLEDGMENTS**

442 This work was supported by grants from the National Nature Science

443 Foundation of China (no. 81201285), the National Nature Science Foundation of  
444 Liaoning Province (no.20170540398), and the Biological Anthropology  
445 Innovation Team Project of JZMU (no.JYLJ201702)

446

447

448

#### 449 REFERENCES

450 1. Méndez EA, Arias CF. 2013. Astroviruses, p 609–628. In Knipe DM,Howley PM, Cohen  
451 JI, Griffin DE, Lamb RA, Martin MA, Racaniello VR,Roizman B (ed), Fields virology,  
452 6th ed, vol 1. Lippincott Williams &Wilkins, Philadelphia, PA.

453 2. Gallimore CI, Taylor C, Gennery AR, Cant AJ, Galloway A, Lewis D,Gray JJ. 2005. Use  
454 of a heminested reverse transcriptase PCR assay for detection of astrovirus in  
455 environmental swabs from an outbreak of gastroenteritis in a pediatric primary  
456 immunodeficiency unit. *J Clin Microbiol* 43(8):3890–3894.

457 3. Wunderli W, Meerbach A, Güngör T, Berger C, Greiner O, Caduff R, Trkola A, Bossart W,  
458 Gerlach D, Schibler M, Cordey S, McKee TA, Van Belle S, Kaiser L, Tapparel C.2011.  
459 Astrovirus infection in hospitalized infants with severe combined immunodeficiency after  
460 allogeneic hematopoietic stem cell transplantation. *PLoS One* 6(11):e27483.

461 4. Silva RC, Benati FJ, Pena GP, Santos N.2010. Molecular characterization of viruses  
462 associated with gastrointestinal infection in HIV-positive patients. *Braz J Infect Dis*  
463 14(6):549-552.

464 5. Quan PL, Wagner TA, Briese T, Torgerson TR, Hornig M, Tashmukhamedova A, Firth C,

- 465 Palacios G, Baisre-De-Leon A, Paddock CD, Hutchison SK, Egholm M, Zaki SR,  
466 Goldman JE, Ochs HD, Lipkin WI. 2010. Astrovirus encephalitis in boy with X-linked  
467 agammaglobulinemia. *Emerg Infect Dis.* 16(6):918-925.
- 468 6. De Benedictis P, Schultz-Cherry S, Burnham A, Cattoli G. 2011. Astrovirus infections in  
469 humans and animals - Molecular biology, genetic diversity, and interspecies  
470 transmissions. *Infect Genet Evol* 11(7):1529-1544.
- 471 7. Al-Mutairy B, Walter JE, Pothen A, Mitchell DK. 2005. Genome prediction of putative  
472 genome-linked viral protein (VPg) of astroviruses. *Virus Genes* 31(1):21–30.
- 473 8. Guix S, Bosch A, Ribes E, Dora Martínez L, Pintó RM. 2004. Apoptosis in  
474 astrovirus-infected CaCo-2 cells. *Virology* 319(2):249–261.
- 475 9. Jiang B, Monroe SS, Koonin EV, Stine SE, Glass RI. 1993. RNA sequence of astrovirus:  
476 distinctive genomic organization and a putative retrovirus-like ribosomal frameshifting  
477 signal that directs the viral replicase synthesis. *Proc Natl Acad Sci U S A.*  
478 90(22):10539–10543.
- 479 10. Méndez-Toss M, Romero-Guido P, Munguía ME, Méndez E, Arias CF. 2000. Molecular  
480 analysis of a serotype 8 human astrovirus genome *J Gen Virol* 81(Pt 12):2891–2897.
- 481 11. Willcocks MM, Boxall AS, Carter MJ. 1999. Processing and intracellular location of  
482 human astrovirus non-structural proteins. *J Gen Virol* 80(Pt 10):2607–2611.
- 483 12. Méndez E, Salas-Ocampo MP, Munguía ME, Arias CF. 2003. Protein products of the  
484 open reading frames encoding nonstructural proteins of human astrovirus serotype 8. *J*  
485 *Virol* 77(21):11378–11384.
- 486 13. Guix S, Caballero S, Bosch A, Pintó RM. 2005. Human astrovirus C-terminal nsP1a

- 487 protein is involved in RNA replication. *Virology* 333(1), 124-31.
- 488 14. Fuentes C, Guix S, Bosch A, Pintó RM. 2011. The C-terminal nsP1a protein of human  
489 astrovirus is a phosphoprotein that interacts with the viral polymerase. *J Virol*  
490 85(9):4470-4479.
- 491 15. Pals MS, Klumperman J. 2009. Trafficking and function of the tetraspanin CD63. *Exp*  
492 *Cell Res* 315(9):1584-1592.
- 493 16. Hassuna N, Monk PN, Moseley GW, Partridge LJ. 2009, Strategies for targeting  
494 tetraspanin proteins: potential therapeutic applications in microbial infections. *BioDrugs*  
495 23(6):341-359
- 496 17. Van Spriël AB, Figdor CG. 2010. The role of tetraspanins in the pathogenesis of  
497 infectious diseases. *Microbes Infect* 12(2), 106-112.
- 498 18. Monk PN, Partridge LJ. 2012. Tetraspanins: gateways for infection. *Infect Disord Drug*  
499 *Targets* 12(1), 4-17.
- 500 19. Hochdorfer D, Florin L, Sinzger C, Lieber D. 2016. Tetraspanin CD151 Promotes Initial  
501 Events in Human Cytomegalovirus Infection. *J Virol* 90(14):6430-6442.
- 502 20. Fast LA, Lieber D, Lang T, Florin L. 2017. Tetraspanins in infections by human  
503 cytomegalo- and papillomaviruses. *Biochem Soc Trans* 45(2):489-497.
- 504 21. Rocha-Perugini V, Suárez H, Álvarez S, López-Martín S, Lenzi GM, Vences-Catalán F,  
505 Levy S, Kim B, Muñoz-Fernández MA, Sánchez-Madrid F, Yáñez-Mó M. 2017. CD81  
506 association with SAMHD1 enhances HIV-1 reverse transcription by increasing dNTP  
507 levels. *Nat Microbiol* 2(11):1513-1522.



- 508 22. Yu G, Bing Y, Li W, Xia L, Liu Z.2014. Hepatitis B virus inhibits the expression of  
509 CD82 through hypermethylation of its promoter in hepatoma cells. *Mol Med Rep*  
510 10(5):2580-2586.
- 511 23. Earnest JT, Hantak MP, Li K, McCray PB Jr, Perlman S, Gallagher T.2017. The  
512 tetraspanin CD9 facilitates MERS-coronavirus entry by scaffolding host cell receptors  
513 and proteases. *PLoS Pathogen* 13(7):e1006546.
- 514 24. Hurwitz SN, Nkosi D, Conlon MM, York SB, Liu X, Tremblay DC, Meckes DG Jr. 2017.  
515 CD63 Regulates Epstein-Barr Virus LMP1 Exosomal Packaging, Enhancement of  
516 Vesicle Production, and Noncanonical NF- $\kappa$ B Signaling. *J Virol* 91(5). pii: e02251-16.
- 517 25. Ahlquist P, Noueir AO, Lee WM, Kushner DB, Dye BT. 2003. Host factors in  
518 positive-strand RNA virus genome replication. *J Virol* 77(15):8181–8186.
- 519 26. Murillo A, Vera-Estrella R, Barkla BJ, Méndez E, Arias CF.2015. Identification of Host  
520 Cell Factors Associated with Astrovirus Replication in Caco-2 Cells. *J Virol*  
521 89(20):10359-10370.
- 522 27. Pols MS, Klumperman J. 2009.Trafficking and function of the tetraspanin CD63. *Exp*  
523 *Cell Res* 315(9):1584-1592.
- 524 28. Berditchevski F.Complexes of tetraspanins with integrins: more than meets the eye.  
525 2001. *J Cell Sci* 114(Pt 23):4143-4151.
- 526 29. Bassani S, Cingolani LA.2012. Tetraspanins: Interactions and interplay with integrins.  
527 *Int J Biochem Cell Biol.* 44(5):703-708.
- 528 30. Radford KJ, Thorne RF, Hersey P.1996. CD63 associates with transmembrane 4  
529 superfamily members, CD9 and CD81, and with beta 1 integrins in human melanoma,

- 530 Biochem. Biophys. Res. Commun 222(1):13-8
- 531 31. Berditchevski F, Odintsova E. 2007. Tetraspanins as regulators of protein trafficking.  
532 Traffic.8(2):89-96
- 533 32. Yoshida T, Kawano Y, Sato K, Ando Y, Aoki J, Miura Y, Komano J, Tanaka  
534 Y, Koyanagi Y. 2008. A CD63 mutant inhibits T-cell tropic human immunodeficiency  
535 virus type 1 entry by disrupting CXCR4 trafficking to the plasma membrane. Traffic  
536 9(4):540-558.
- 537 33. Latysheva N, Muratov G, Rajesh S, Padgett M, Hotchin NA, Overduin M, Berditchevski  
538 F. 2006. Syntenin-1 is a new component of tetraspanin-enriched microdomains:  
539 mechanisms and consequences of the interaction of syntenin-1 with CD63. Mol Cell Biol  
540 26(20):7707-7718.
- 541 34. Monk PN, Partridge LJ. 2012. Tetraspanins: gateways for infection. Infect Disord Drug  
542 Targets 12(1):4-17.
- 543 35. Stipp CS, Kolesnikova TV, Hemler ME. 2003. Functional domains in tetraspanin  
544 proteins. Trends Biochem Sci 28(2):106-112.
- 545 36. Kitadokoro K, Bordo D, Galli G, Petracca R, Falugi F, Abrignani S, Grandi G, Bolognesi  
546 M. 2001. CD81 extracellular domain 3D structure: insight into the tetraspanin  
547 superfamily structural motifs. EMBO J 15; 20(1-2):12-8.
- 548 37. von Lindern JJ, Rojo D, Grovit-Ferbas K, Yeramian C, Deng C, Herbein G, Ferguson  
549 MR, Pappas TC, Decker JM, Singh A, Collman RG, O'Brien WA. 2003.  
550 Potential role for CD63 in CCR5-mediated human immunodeficiency virus type 1 infecti  
551 on of macrophages. J Virol 77(6):3624-3633.

- 552 38. Li G, Dziuba N, Friedrich B, Murray JL, Ferguson MR.  
553 A post-entry role for CD63 in early HIV-1 replication. *Virology* 412(2):315-324.
- 554 39. Chen H, Dziuba N, Friedrich B, von Lindern J, Murray JL, Rojo DR, Hodge TW, O'Brien  
555 WA, Ferguson MR. 2008. A critical role for CD63 in HIV  
556 replication and infection of macrophages and cell lines. *Virology* 379(2): 191-196.
- 557 40. Grigorov B, Molle J, Rubinstein E, Zoulim F, Bartosch B. 2017. CD81 large extracellular  
558 loop-containing fusion proteins with a dominant negative effect on HCV cell spread and  
559 replication. *J Gen Virol* 98(7):1646-1657.
- 560 41. Ramanathan A, Gusarova V, Stahl N, Gurnett-Bander A, Kyratsous CA. 2016.  
561 Alirocumab, a Therapeutic Human Antibody to PCSK9, Does Not Affect CD81 Levels  
562 or Hepatitis C Virus Entry and Replication into Hepatocytes. *PLoS One* 26;  
563 11(4):e0154498.
- 564 42. Scheffer KD, Gawlitza A, Spoden GA, Zhang XA, Lambert C, Berditchevski F, Florin L.  
565 2013. Tetraspanin CD151 mediates papillomavirus type 16 endocytosis. *J*  
566 *Virology* 87(6):3435-3446.
- 567 43. Gräbel L, Fast LA, Scheffer KD, Boukhallouk F, Spoden GA, Tenzer S, Boller K, Bago  
568 R, Rajesh S, Overduin M, Berditchevski F, Florin L. 2016.  
569 The CD63-Syntenin-1 Complex Controls Post-Endocytic Trafficking of Oncogenic  
570 Human Papillomaviruses. *Sci Rep* 6:32337.
- 571 44. Mazurov D, Heidecker G, Derse D. 2006. HTLV-1 Gag protein associates with  
572 CD82 tetraspanin microdomains at the plasma membrane. *Virology* 346(1): 194-  
573 204.

- 574 45. Shanmukhappa K, Kim JK, Kapil S.2007. Role of CD151, A tetraspanin, in porcine  
575 reproductive and respiratory syndrome virus infection. *Virology* 16; 4:62.
- 576 46. Halasz P, Fleming FE, Coulson BS.2005. Evaluation of specificity and effects  
577 of monoclonal antibodies submitted to the Eighth Human Leucocyte Differentiation  
578 Antigen Workshop on rotavirus-cell attachment and entry. *Cell Immunology*  
579 236(1-2):179-187.
- 580 47. Barreto A, Rodríguez LS, Rojas OL, Wolf M, Greenberg HB, Franco MA, Angel J.2010.  
581 Membrane vesicles released by intestinal epithelial cells infected with  
582 rotavirus inhibit T-cell function. *Viral Immunology* 23(6):595-608.
- 583 48. Ivanusic D.2014. HIV-1 cell-to-cell spread: CD63-gp41 interaction at  
584 the virological synapse. *AIDS Research and Human Retroviruses* 30(9):844-845.
- 585 49. Méndez E, Muñoz-Yañez C, Sánchez-San Martín C, Aguirre-Crespo G, Baños-Lara  
586 Mdel R, Gutierrez M, Espinosa R, Acevedo Y, Arias CF, López S.2014.  
587 Characterization of human astrovirus cell entry. *Journal of Virology* 88(5):2452-2460.
- 588 50. Chapellier B, Tange S, Tasaki H, Yoshida K, Zhou Y, Sakon N, Katayama K, Nakanishi  
589 A.2015. Examination of a plasmid-based reverse genetics system for human astrovirus.  
590 *Microbiology and Immunology* 9(10):586-596.
- 591 51. Liu C, Liu WH, Kan LL, Li X, Li YG, Zhao W.2014. Production of polyclonal antibody  
592 to a recombinant non-structural protein Nsp1a of human astrovirus. *Journal of Virology Methods*.  
593 209:82-85.

594

595

596 **FIGURE LEGENDS**

597

598 **Fig. 1. Construction of nsP1a bait plasmid and detection of**  
599 **auto-activation.** (A) Construction of pGBKT7-nsP1a bait plasmid. Lane M:  
600 DL15000 DNA marker; Lane 1: amplified fragment of nsP1a; Lane 2:  
601 confirmation of pGBKT7-nsP1a by digestion with BamH I and Pst I. (B)  
602 Determination of the auto-activation of the pGBKT7-nsP1a bait plasmid in yeast  
603 cells. The pGBKT7-nsP1a bait and pGBKT7 plasmids were used to transform  
604 Y2HGold cells and then grown on different plates. Co-transformants containing  
605 pGADT7-T and pGBKT7-53 were grown on SD -Leu-Trp-His plates as a  
606 positive control. Co-transformants containing pGADT7-Lam and pGBKT7-T  
607 were grown on SD -Leu-Trp-His plates as negative control. a: pGBKT7-ORF1a  
608 + pGADT7; b: pGBKT7-53 + pGADT7-T;c: pGBKT7-Lam + pGADT7-T.

609

610 **Fig. 2. Analysis of putatively positive colonies of Y2HGold cells.** Y2HGold  
611 clones containing the cDNA library were grown on dropout medium lacking  
612 tryptophan and leucine (SD-Trp-Leu). There were 25 clones, and the total  
613 number cloned was  $2.5 \times 10^5$ . Yeast cells containing the bait (HAstV nsP1a) and  
614 prey plasmids (Caco-2 cell cDNA library) were screened for interaction on  
615 synthetic dropout media. (A) Screen for interaction on SD-Trp-Leu medium. (B)  
616 Screen for interaction on synthetic dropout medium lacking tryptophan,  
617 leucine, and histidine (SD-Trp-Leu-His). (C) Screen for interaction on synthetic

618 dropout medium lacking tryptophan, leucine, histidine, and adenine  
619 (SD-Trp-Leu-His-Ade). (D) Confirmation of positive interactions on  
620 SD-Trp-Leu-X-Gal medium; 15 clones demonstrating protein interactions  
621 between HAstV and nsP1a were obtained. Co-transformation with pGADT7-T  
622 and pGBKT7-Lam was used as a negative control (-). Co-transformation with  
623 pGADT7-T and pGBKT7-53 was used as a positive control (+).  
624 Co-transformation with pGBKT7-nsP1a and pGADT7 was used as an  
625 auto-activation control (\*).

626

627 **Fig. 3. nsP1a interacts with CD63 *in vivo* and *in vitro*.** (A) HEK293T cells  
628 were co-transfected with nsP1a-HA plasmid and CD63-Flag plasmid for 48 h  
629 and harvested. Cell lysates from co-transfected and untransfected control cells  
630 were immunoprecipitated with antibody against Flag or HA and then analyzed by  
631 western blot. (B) The recombinant plasmids nsP1a-GST were transfected into *E.*  
632 *coli* BL21 (DE3) cells. The cells were then mixed with IPTG at concentrations  
633 of 0, 0.1, 0.2, 0.4, 0.8, and 1mM (lanes 1–6, respectively) to induce the  
634 expression of nsP1a. The cells were then incubated for an additional 5 h at 25°C.  
635 The purified nsP1a-GST protein (110kDa) was analyzed by SDS-PAGE and  
636 stained with Coomassie blue R-250 (lane 7). The recombinant protein CD63-His  
637 was detected by western blot using CD63 antibody. Lane M: protein molecular  
638 weight marker. (C) nsP1a-GST was immobilized on glutathione agarose.  
639 CD63-His was then added to assay protein binding. The proteins were washed,

640 eluted from the agarose beads, and confirmed by immunoblotting. The  
641 expression of nsP1a was detected by anti-GST mAb. CD63 was detected by  
642 anti-His.

643

644 **Fig. 4. The C-terminal nonstructural protein nsP1a/4 interacts with the**  
645 **CD63 large loop LEL domain.** Structure of the protein domains of CD63 and  
646 the LEL domain. (B) Schematic representation of the protein domains of the  
647 HAstV nsP1a protein and the four domains protein tested in this study. (C) The  
648 recombinant plasmids CD63-LEL were transfected into *E. coli* BL21 (DE3).  
649 The cells were mixed with 0, 0.1, 0.2, 0.4, 0.8, or 1 mM IPTG (lanes 1–6,  
650 respectively) to induce CD63 expression, and the culture was incubated for an  
651 additional 6 h at 30°C. The purified CD63-LEL-His protein (11 kDa) was  
652 analyzed by SDS-PAGE and stained with Coomassie blue R-250 (lane 7). The  
653 recombinant protein CD63-LEL was detected by western blot using CD63  
654 antibody (lane 8). (D) The recombinant plasmid nsP1a/4-GST was transfected  
655 into *E. coli* BL21 (DE3). The cells were mixed with 0, 0.1, 0.2, 0.4, 0.8, or 1 mM  
656 IPTG (lanes 1–6, respectively) to induce nsP1a/4 expression, and the culture was  
657 incubated for an additional 6 h at 37°C. The purified nsP1a/4-GST protein  
658 (66 kDa, GST 26 kDa) was analyzed by SDS-PAGE and stained with Coomassie  
659 blue R-250 (lane 7). The recombinant protein nsP1a/4 was detected by western  
660 blot using nsP1a/4 antibody (lane 8). Lane M: protein molecular weight marker.  
661 (E) nsP1a/4-GST was immobilized on glutathione agarose. CD63-LEL-His was

662 added to assay protein-protein binding. After washing, proteins were eluted from  
663 the agarose beads and confirmed by immunoblotting. The expression of nsP1a/4  
664 was detected by anti-GST mAb, and CD63-LEL was detected by anti-His. (F)  
665 HEK293T cells were co-transfected nsP1a/4-HA plasmid and CD63-LEL-Flag  
666 plasmid for 48 h and harvested. Cell lysates from co-transfected and  
667 untransfected control cells were immunoprecipitated with antibody against Flag  
668 or HA followed by western blot analysis.

669

670 **Fig. 5. Co-localization of nsP1a/4 protein with CD63-LEL protein.** 293 T  
671 cells were co-transfected with PEF-nsP1a/4-HA and pcDNA3.1(+)-CD63-LEL  
672 Flag plasmids. Cells were fixed after 48 h and subjected to indirect  
673 immunofluorescence to detect CD63-LEL-Flag (red, A) and nsP1a/4-HA (green,  
674 B) with rabbit anti-Flag and mouse anti-HA antibodies. The position of the  
675 nucleus is indicated by DAPI (blue, C) staining in the merged image.  
676 Co-expression of CD63-LEL and nsP1a/4 showing cytoplasm localization in  
677 merged images D.

678

679 **Fig. 6. CD63 effect on HAstV-1 replication.** The amount of CD63 mRNA  
680 expression in the Caco-2 cells infected with HAstV-1 virus by real-time  
681 PCR( $P < 0.01$ ); (A) Real time PCR analysis of CD63 mRNA expression in  
682 Caco-2 cells infected with HAstV-1. (B) Western blot analysis of CD63 protein  
683 expression in Caco-2 cells infected with HAstV-1. (C) Intracellular viral RNA



684 levels assayed by real-time PCR ( $P < 0.01$ ). (D) Overexpression of CD63  
685 mediated by eukaryotic expression vector pcDNA3.1-3flag and knockdown of  
686 CD63 expression mediated by shRNA. (E) Intracellular CD63 mRNA  
687 expression levels assayed by real-time PCR ( $P < 0.01$ ). (F) Intracellular viral  
688 RNA levels assayed by real-time PCR ( $P < 0.01$ ).

689

690

Table 1 Oligonucleotides used in this study

| Primer Name    | Sequence(5'-3')                                                       | Use                             |
|----------------|-----------------------------------------------------------------------|---------------------------------|
| Pgex-1a-F      | CGC <i>GGATCC</i> ATGGCACACGGTGAGCCATACTATAGT                         | Construction of pGEX-6P-nsP1a   |
| Pgex-1a-R      | CCG <i>CTCGAG</i> ATGAGTGGTAGGTTTGGGCCCTTGG                           |                                 |
| Pgex-1a/4-F    | CGC <i>GGATCC</i> atg ACCAACACTGGGTATACTGGAGGTG                       | Construction of pGEX-6P-nsP1a/4 |
| Pgex-1a/4-R    | CCG <i>CTCGAG</i> ATGAGTGGTAGGTTTGGGCCCTT                             |                                 |
| PET-LEL-F      | CCG <i>CTCGAG</i> ATGTATGTGTTTAGAGATAAGGTGA                           | Construction of pET-29a-LEL     |
| PET-LEL-R      | CGC <i>GGATCC</i> CACATTTTCTCAGCCAGCCCCAA                             |                                 |
| CD63-GFP-F     | CCG <i>CTCGAG</i> GGATGGCGGTGGAAGGAGGAATGAAATG                        | Construction of pEGFP-N3-CD63   |
| CD63- GFP-R    | CGC <i>GGATCC</i> ATCACCTCGTAGCCACTTCTGATA                            |                                 |
| CD63-3flag- F  | CCC <i>AAGCTT GCCACC</i> ATGGCGGTGGAAGGAGGAATGAAATG                   | pcDNA3.1-3flag-CD63             |
| CD63-3flag- R  | CCGCTCGAGTTACTTATCGTCGTCATCCTTGTAATCCATCACC<br>TCGTAGCCACTTCTGATAC    |                                 |
| LEL-3flag- F   | CCC <i>AAGCTT GCCACC</i> ATGTATGTGTTTAGAGATAAGGTGA                    | pcDNA3.1-3flag-CD63-LEL         |
| LEL-3flag -R   | CCGCTCGAGTTACTTATCGTCGTCATCCTTGTAATC<br>CACATTTTCTCAGCCAGCCCCAA       |                                 |
| 1a-HA-F        | Gactagcc ATGGCACACGGTGAGCCATACTA                                      | PEF-HA-PGK-hygro-1a             |
| 1a-HA-R        | TTCGTCGACATCGATGGATCC<br>ATGAGTGGTAGGTTTGGGCCCTT                      |                                 |
| 1a/4-HA-F      | gactagcc ATGACCAACTGGGTATACTGGAG                                      | PEF-HA-PGK-hygro-1a/4           |
| 1a/4-HA-R      | TTCGTCGACATCGATGGATCC<br>ATGAGTGGTAGGTTTGGGCCCTT                      |                                 |
| CD63-shRNA-1-F | GATCCCgcAAGGAGAACTATTGTCTTACTCGAGTTTTGGAT<br>TAAGACAATAGTTCTCCTTGC    | hU6-shRNA- CD63-1               |
| CD63-shRNA-1-R | AGCTATCCAAAAgcAAGGAGAACTATTGTCTTACTCGAG<br>TAAGACAATAGTTCTCCTTGC      |                                 |
| CD63-shRNA-2-F | GATCCCgcTGGCTATGTGTTTAGAGATCTCGAG<br>ATCTCTAAACACATAGCCAGC TTTTGGAT   | hU6-shRNA- CD63-2               |
| CD63-shRNA-2-R | AGCTATCCAAAAgcTGGCTATGTGTTTAGAGAT CTCTCGAG<br>ATCTCTAAACACATAGCCAGCGG |                                 |
| CD63- QPCR-F   | GTGGAAGGAGGAATGAAATGTGT                                               | CD63 mRNA quantity              |
| CD63- QPCR-R   | AAAGCCACCAGGAAGAGGAAG                                                 | SYBR method for Real time PCR   |
| HAstV-QPCR-F   | AAATCAAGAGCCCGTTCA                                                    | Viral mRNA quantity (ORF2 gene) |
| HAstV-QPCR-R   | ACGCCTCAATCTCGGTAG                                                    | SYBR method for Real time PCR   |

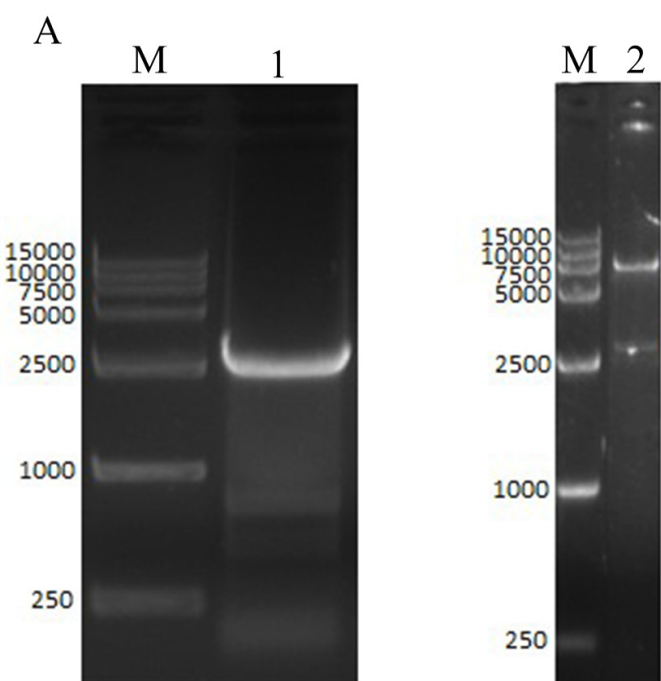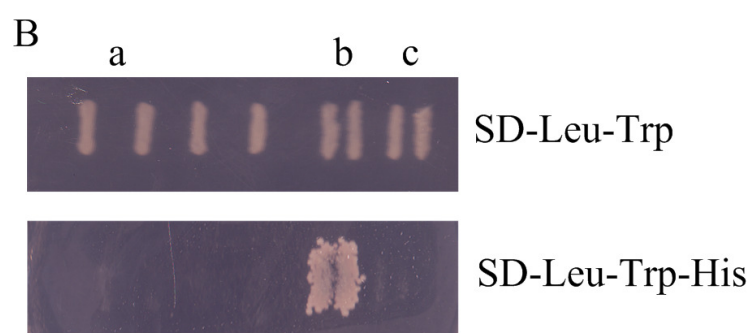

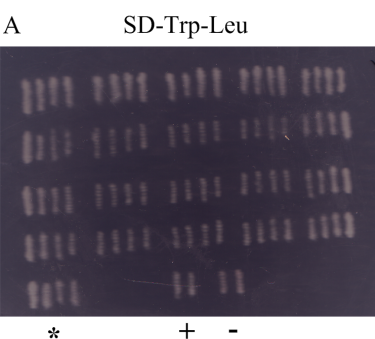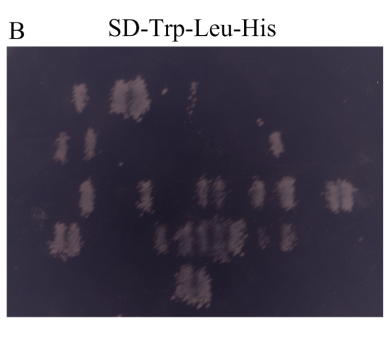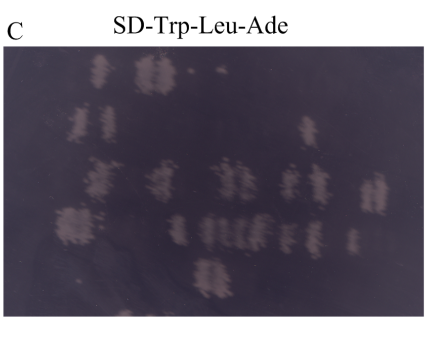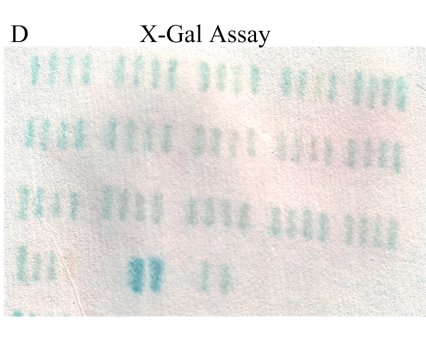

A

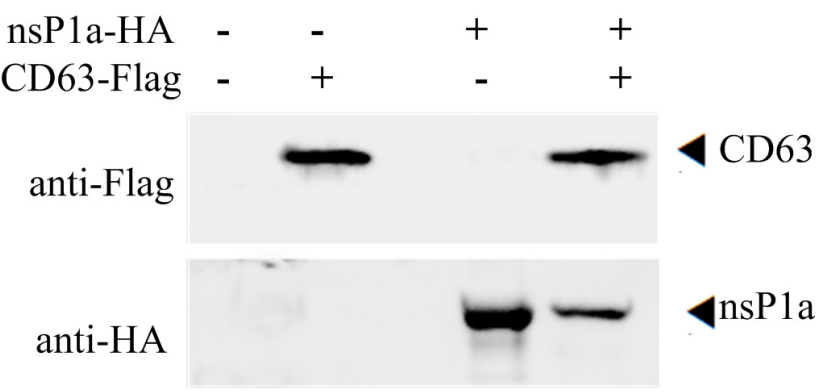

C

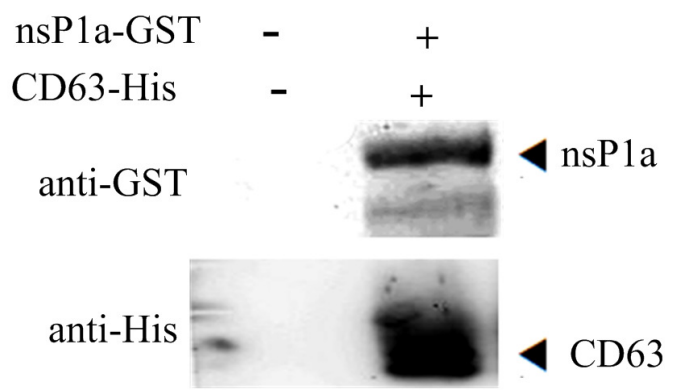

B

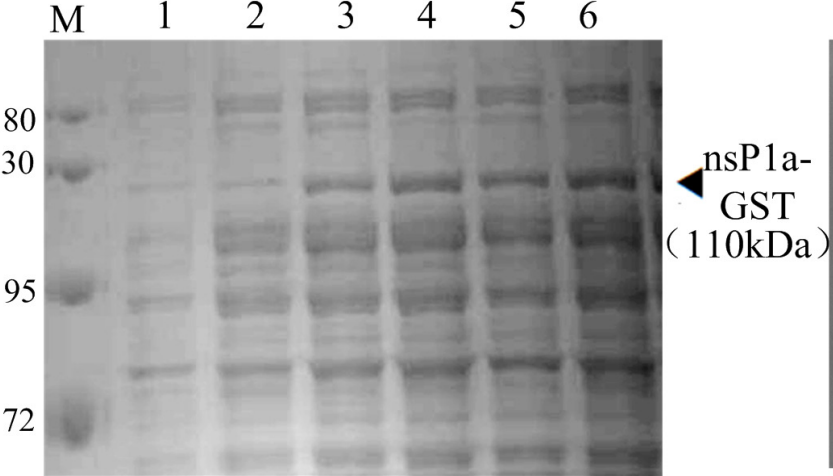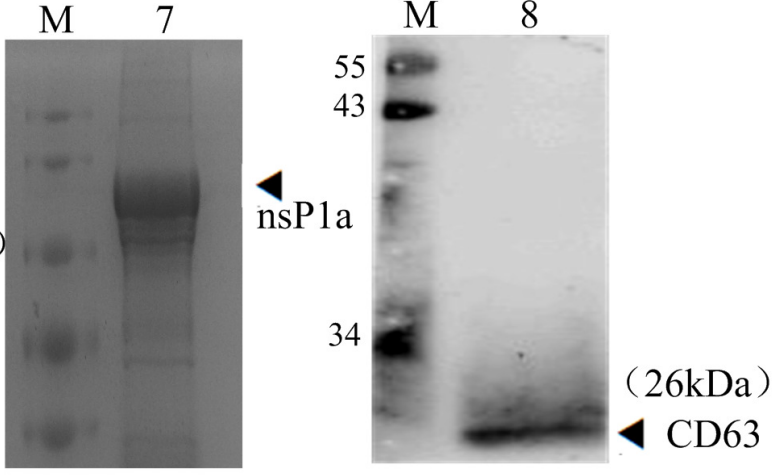

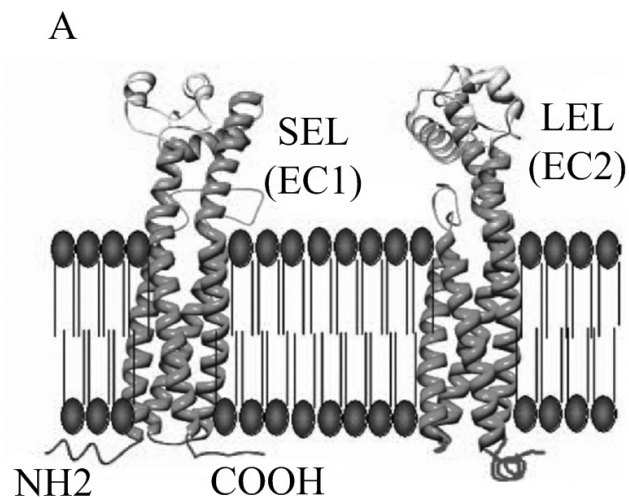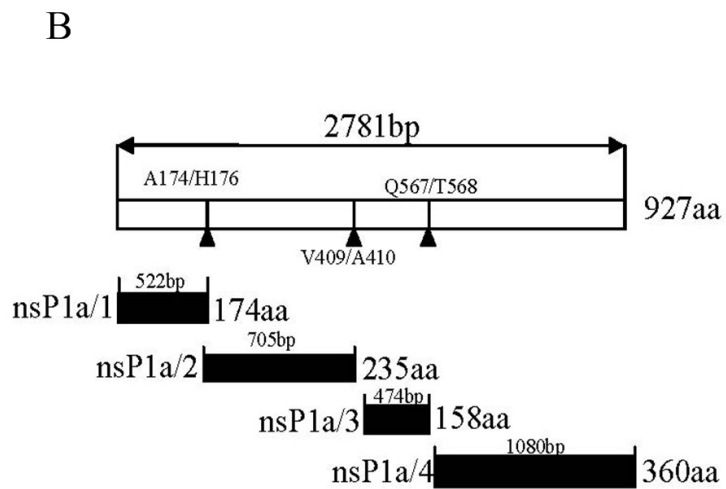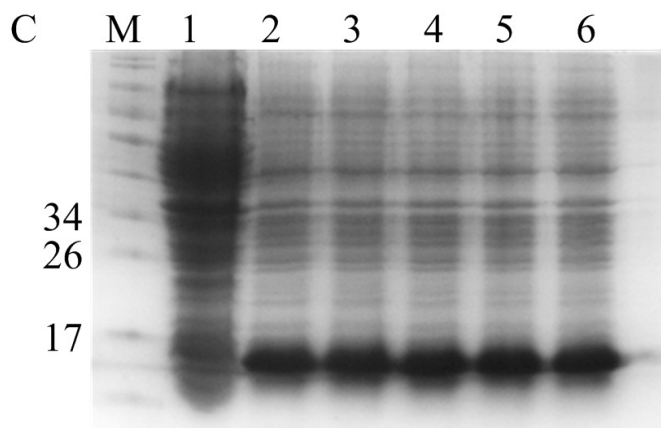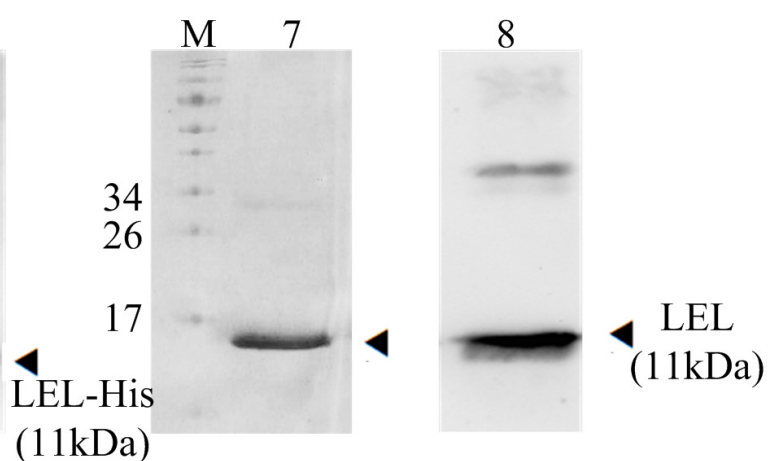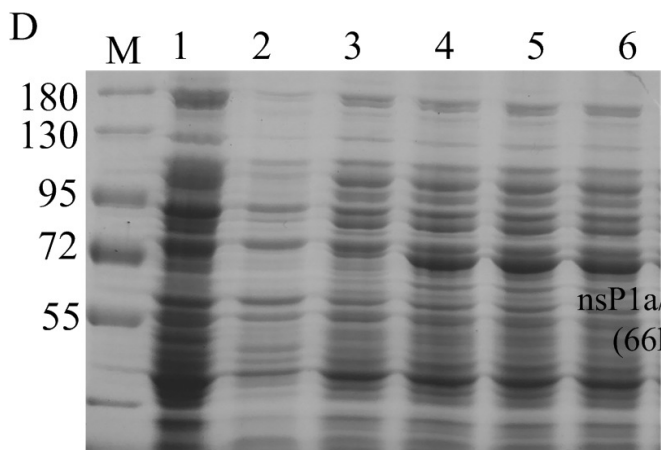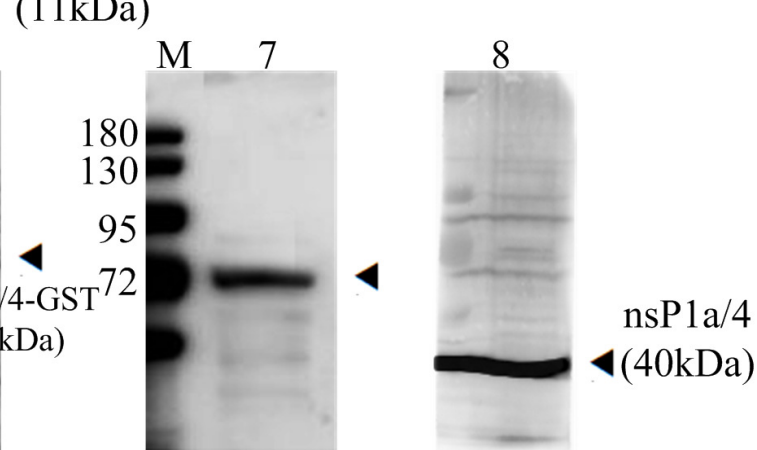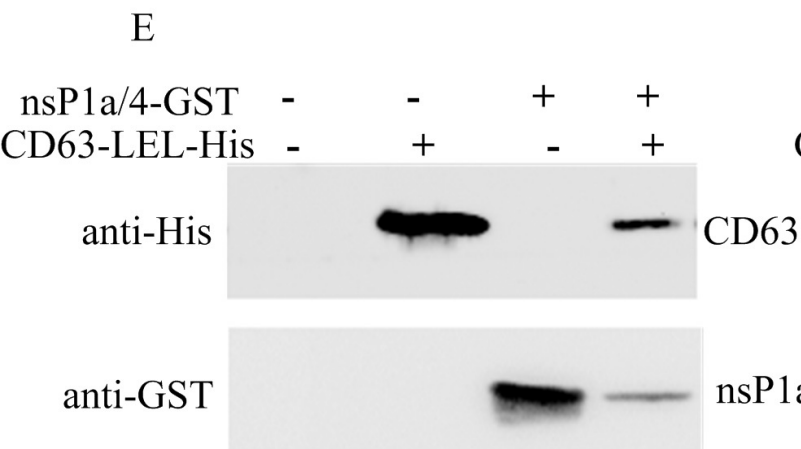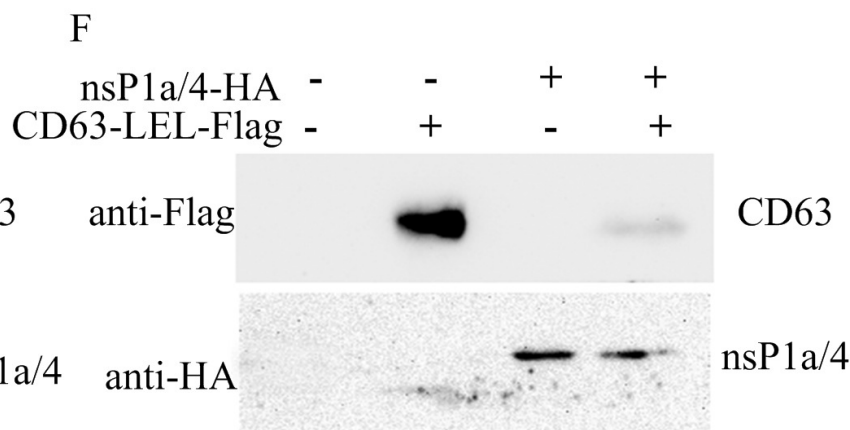

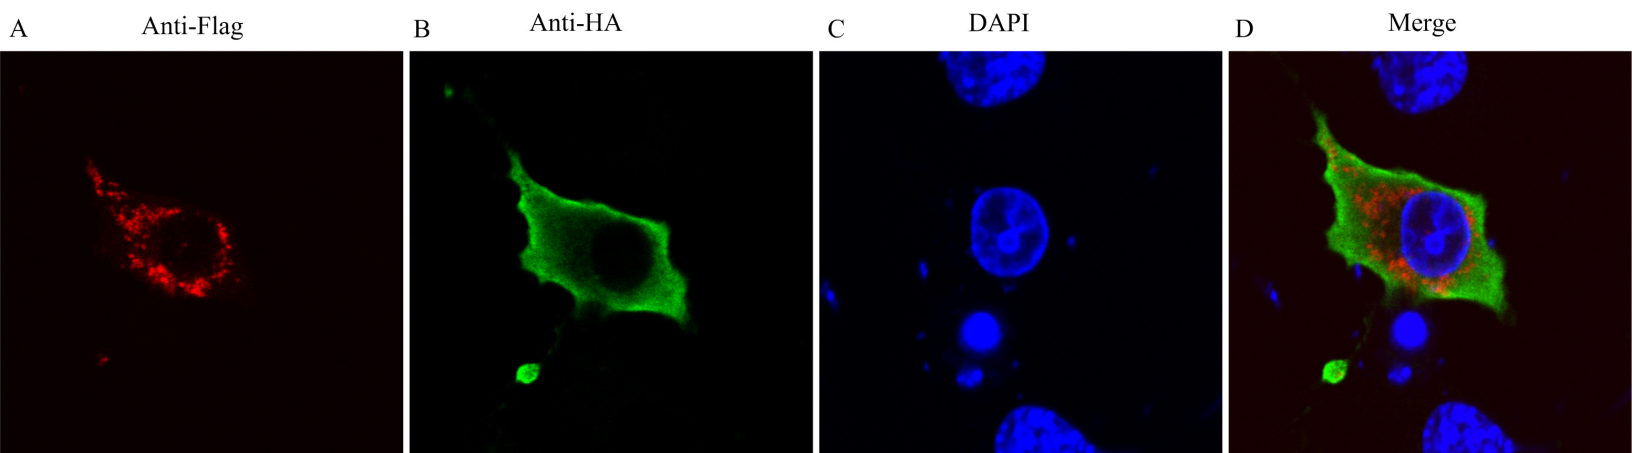

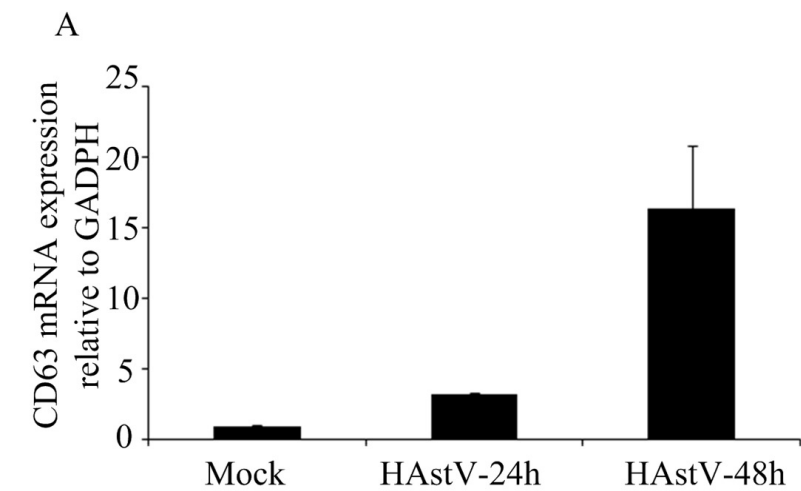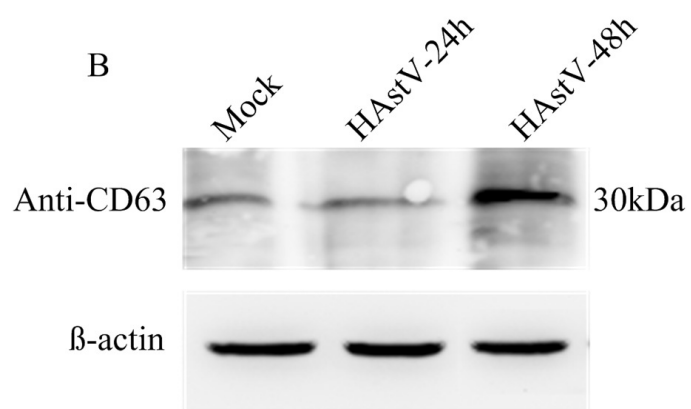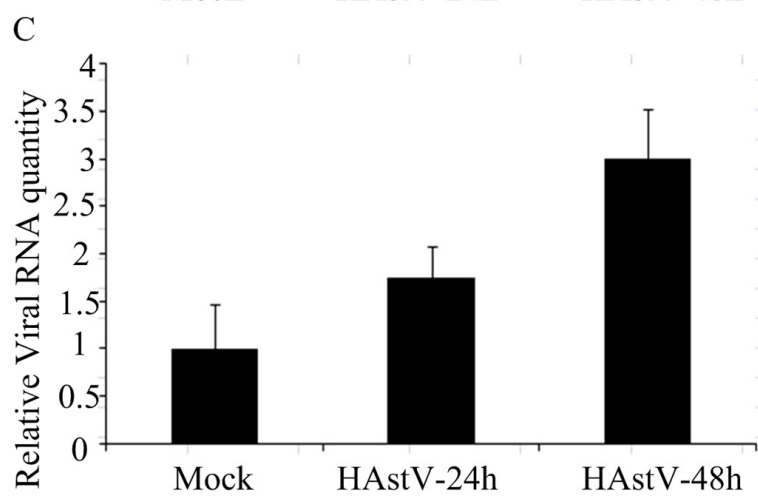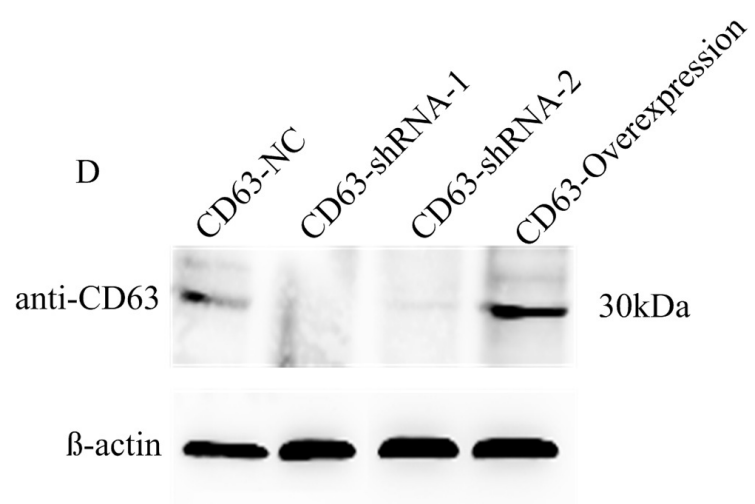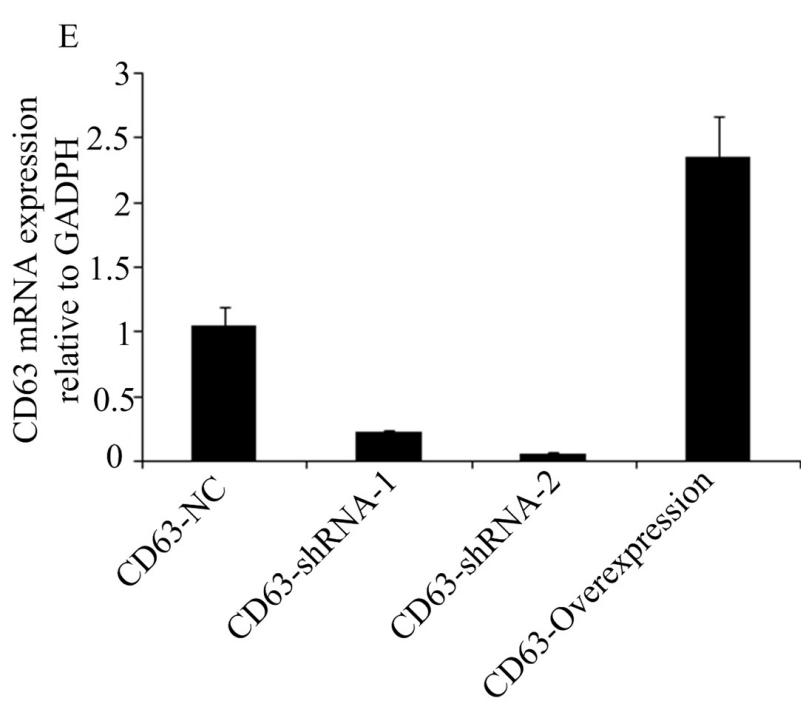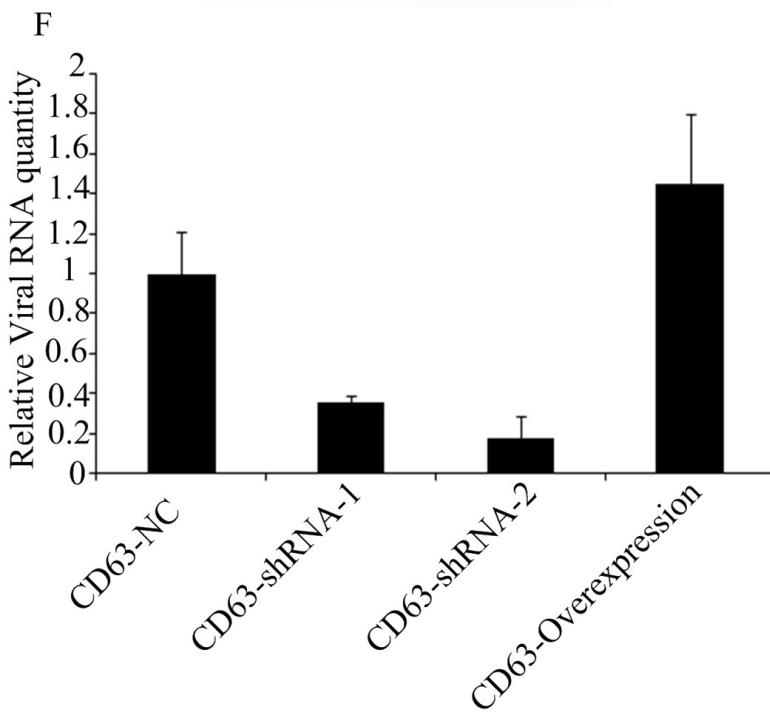

Source: http://biorxiv.org/content/10.1101/331835v1.full.pdf
